# Supplementary material for: Design of Cu/ZnO/Al2O3catalysts with a rich Cu–ZnO interface for enhanced CO2hydrogenation to methanol using zinc-malachite as the precursor
Source: Royal Society of Chemistry journal article supplement (doi:10.1039/d2nj05903g), 2023-01-01
Supplement: d2nj05903g1.pdf [file d2nj05903g1.pdf]

**Electronic Supplementary Information for *New Journal of Chemistry***

**Design of Cu/ZnO/Al<sub>2</sub>O<sub>3</sub> catalysts with rich Cu-ZnO interface for enhanced CO<sub>2</sub>  
hydrogenation to methanol using zinc-malachite as precursor**

**Haotian Zhang <sup>a</sup>, Caiyun Han <sup>a</sup>, Congming Li <sup>c</sup>, Peng Wang <sup>a, b, \*</sup>, Hao Huang <sup>d</sup>, Shuang  
Wang <sup>a, b, \*</sup>, Jinping Li <sup>b</sup>**

<sup>a</sup> College of Environmental Science and Engineering, Taiyuan University of Technology,  
Jinzhong 030600, Shanxi, P.R. China.

<sup>b</sup> Shanxi Key Laboratory of Gas Energy Efficient and Clean Utilization, Taiyuan  
University of Technology, Taiyuan 030024, Shanxi, P.R. China.

<sup>c</sup> State Key Laboratory of Clean and Efficient Coal Utilization, Taiyuan University of  
Technology, Taiyuan 030024, Shanxi, China.

<sup>d</sup> Department of Microsystems, University of South-Eastern Norway, Borre 3184,  
Norway.

E-mails: [wangshuang@tyut.edu.cn](mailto:wangshuang@tyut.edu.cn), [wangpeng01@tyut.edu.cn](mailto:wangpeng01@tyut.edu.cn)

## **Contents**

**Section S1 Materials characterization**

**Section S2 Catalytic performance measurement**

**Section S3 Attached drawings and schedules**

## Section S1 Materials characterization

**Powder X-ray Diffraction (XRD):** XRD patterns were analyzed on a Bruker D8 Advance X-ray diffractometer using Cu K $\alpha$  radiation (40 kV, 40 mA,  $\lambda = 0.15418$  nm) with a scan rate of  $8^\circ \cdot \text{min}^{-1}$  and a  $2\theta$  range of  $10$ - $50^\circ$  for precursors and  $10$ - $80^\circ$  for catalysts.

**Inductively Coupled Plasma Optical Emission Spectrometer (ICP-OES):** Elemental content data for Cu, Zn, and Al were obtained by a PerkinElmer Avio 200 ICP-OES instrument. Samples were digested as described below. A 10 mg sample was dispersed in 10 mL of phosphoric acid and then diluted to 100 mL with deionized water prior to measurement.

**Nitrogen adsorption and desorption isotherms:** N<sub>2</sub> adsorption-desorption measurements were performed by nitrogen adsorption ( $-77$  K) on a Micromeritics TriStar II 3020 instrument. Prior to testing, samples were vacuum dried at  $200^\circ\text{C}$  for 10 h. Surface areas were calculated using the Brunauer-Emmett-Teller (BET) method.

**Transmission electron microscopy (TEM):** TEM samples were prepared by dispersing the samples in ethanol using a sonic bath followed by drop casting onto copper grid. The TEM images and EDS mapping were performed using JEM-2100F with an accelerating voltage of 200 kV.

**X-ray photoelectron spectroscopy (XPS):** XPS measurements were performed on a Thermo Fisher Scientific K-Alpha spectrometer with Al K $\alpha$  (1486.8 eV) as the X-ray source. The samples used for testing were CZA-1-R, CZA-2-R and CZA-3-R.

**Temperature-programmed H<sub>2</sub> reduction (H<sub>2</sub>-TPR):** H<sub>2</sub>-temperature programmed reduction (H<sub>2</sub>-TPR) was carried out using Micromeritics AutoChem II 2920 chemisorption analyzer. Before the H<sub>2</sub>-TPR test, the calcined sample of 50 mg was

heated to 150°C under Ar atmosphere (30 mL·min<sup>-1</sup>) and purged for 1 h, and then cooled to 50°C. The reduction process was performed in the range of 50-400°C under 10% H<sub>2</sub>/Ar (30 mL·min<sup>-1</sup>) atmosphere.

**Temperature-programmed CO<sub>2</sub> desorption (CO<sub>2</sub>-TPD):** CO<sub>2</sub>-TPD were carried out using a Micromeritics AutoChem II 2920 chemisorption instrument. Before the CO<sub>2</sub>-TPD test, the reduced sample of 50 mg was heated to 150°C under He atmosphere (30 mL·min<sup>-1</sup>) and purged for 1 h. After being cooled to 50°C in a He atmosphere, the sample was purged with 10% CO<sub>2</sub>/He mixture (30 mL·min<sup>-1</sup>) for 1.5 h at 50°C to saturate the surface, then purged in flowing He (30 mL·min<sup>-1</sup>) for 1.5 h to remove physically adsorbed CO<sub>2</sub>. Subsequently, the temperature was elevated in flowing He (30 mL·min<sup>-1</sup>) until up to 800°C at a ramp rate of 10°C·min<sup>-1</sup>. CO<sub>2</sub> desorption amount was quantitatively measured based on CO<sub>2</sub> single-pulse experiment.

**Temperature-programmed H<sub>2</sub> desorption (H<sub>2</sub>-TPD):** H<sub>2</sub>-TPD were carried out using a Micromeritics AutoChem II 2920 chemisorption instrument. H<sub>2</sub>-TPD experiment was carried out with the similar method as that employed in CO<sub>2</sub>-TPD. Before the H<sub>2</sub>-TPD test, the reduced sample of 50 mg was heated to 150°C under Ar atmosphere (30 mL·min<sup>-1</sup>) and purged for 1 h. After being cooled to 50°C in an Ar atmosphere, the sample was purged with 10% H<sub>2</sub>/Ar mixture (30 mL·min<sup>-1</sup>) for 1.5 h at 50°C to saturate the surface, then purged in flowing Ar (30 mL·min<sup>-1</sup>) for 1.5 h to remove physically adsorbed H<sub>2</sub>. Subsequently, the temperature was elevated in flowing Ar (30 mL·min<sup>-1</sup>) until up to 800°C at a ramp rate of 10°C·min<sup>-1</sup>. The desorbed H<sub>2</sub> signal was monitored by a TCD detector, and H<sub>2</sub> desorption amount was quantitatively calculated by H<sub>2</sub> single-pulse experiment.

**Cu dispersion (D<sub>Cu</sub>) and metallic Cu special surface area (S<sub>Cu</sub>):** Assuming that the

chemisorption of H on copper atoms proceeds according to Cu:H = 2:1, the specific surface area ( $S_{Cu}$ ) and dispersion  $D_{Cu}$  of copper are calculated as follows:

$$S_{Cu} = 4 \times H_2\text{uptake} \times N_{av} / (1.47 \times 10^{19}) (\text{m}^2/\text{g})$$

In this equation,  $N_{av}$  is Avogadro's constant and  $1.47 \times 10^{19}$  is the value of Cu atoms per square meter <sup>1</sup>.

$$\begin{aligned} D_{Cu} &= \frac{\text{amount of Cu atoms on surface (moles)}}{\text{total amount of Cu atoms on sample (moles)}} \times 100\% \\ &= \frac{H_2\text{uptake} \times 4(\text{moles})}{\text{total amount of Cu atoms on sample (moles)}} \times 100\% \end{aligned}$$

## Section S2 Catalytic performance measurement

Activity measurements in the hydrogenation of CO<sub>2</sub> were carried out in a fixed-bed reactor. Calcined sample (CZA-C, 0.4 g, 40 - 60 mesh) diluted with 1.1 g quartz sand (40 - 60 mesh) was placed in a stainless steel tube reactor. Prior to reaction, the sample was reduced in H<sub>2</sub>/N<sub>2</sub> (10/90, v/v) mixture gas at a flow-rate of 60 mL min<sup>-1</sup> under atmospheric pressure. The reduction temperature was programmed to increase from room temperature to 290°C and maintained at 290°C for 4 h. The reactor was then cooled to room temperature. After reduction, the activities of the catalyst samples in CO<sub>2</sub> hydrogenation process were determined under specific reaction conditions.

The exit gas from the reactor was maintained at 150°C and immediately transported to the sample valve of the GC (Agilent 8860), which was equipped with thermal conductivity (TCD) and flame ionization detectors (FIDs). TDX-01 C molecular sieve packed columns (1 m × 3 mm; Agilent) were connected to TCD, whereas HP-PLOT/Q capillary columns were connected to FID. The packed column was used for the analysis of CO<sub>2</sub> and CO, and the capillary column (30 m × 0.32 mm × 20 μm; Agilent Technologies, Inc) was used for methanol (CH<sub>3</sub>OH), methoxymethane (CH<sub>3</sub>OCH<sub>3</sub>), methane (CH<sub>4</sub>) and other C-containing products. CO<sub>2</sub> conversion (denoted as X<sub>CO<sub>2</sub></sub>), the CH<sub>3</sub>OH selectivity (denoted as S<sub>CH<sub>3</sub>OH</sub>) and the yield of CH<sub>3</sub>OH were calculated using an external normalization method, which were defined as the following Eq. 1, Eq. 2, and Eq. 3.

$$X_{\text{CO}_2}(\%) = \frac{n(\text{CO}) + n(\text{CH}_4) + n(\text{CH}_3\text{OH})}{n(\text{CO}) + n(\text{CH}_4) + n(\text{CH}_3\text{OH}) + n(\text{CO}_2)} \times 100 \quad \text{Eq. 1}$$

$$S_{\text{CH}_3\text{OH}}(\%) = \frac{n(\text{CH}_3\text{OH})}{n(\text{CH}_3\text{OH}) + n(\text{CO}) + n(\text{CH}_4)} \times 100 \quad \text{Eq. 2}$$

$$\text{Yield}_{\text{CH}_3\text{OH}}(\%) = X_{\text{CO}_2} \times S_{\text{CH}_3\text{OH}} \times 100 \quad \text{Eq. 3}$$

### Section S3 Attached drawings and schedules

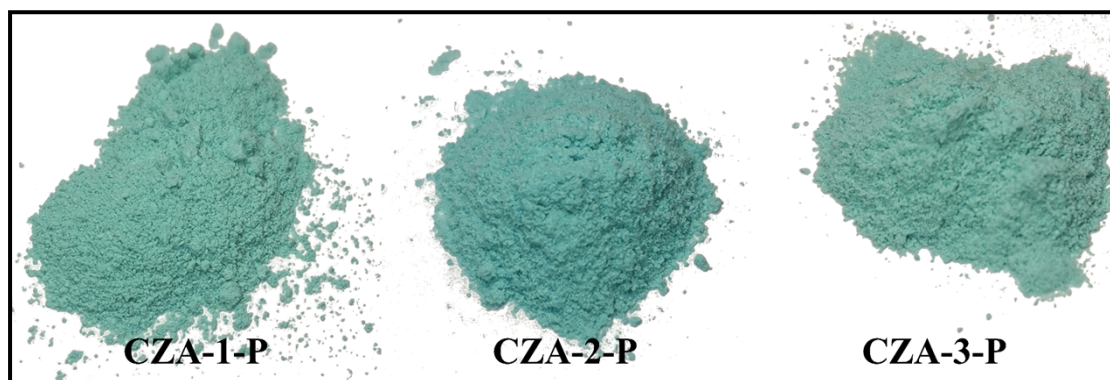

**Photo S1.** Photos of precursors and calcined samples.

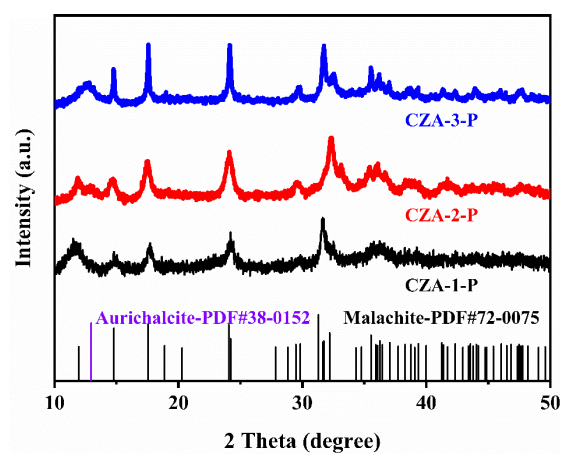

**Fig. S1.** XRD patterns of CZA-1-P, CZA-2-P and CZA-3-P.

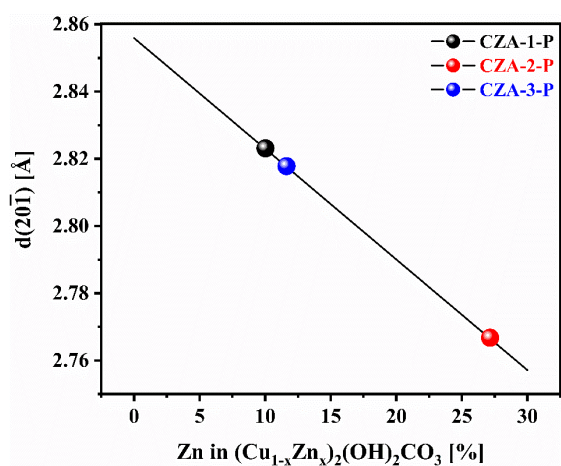

**Fig. S2.** The lattice plane reflection characteristics and zinc substitutions amount of CZA-1-P, CZA-2-P and CZA-3-P.



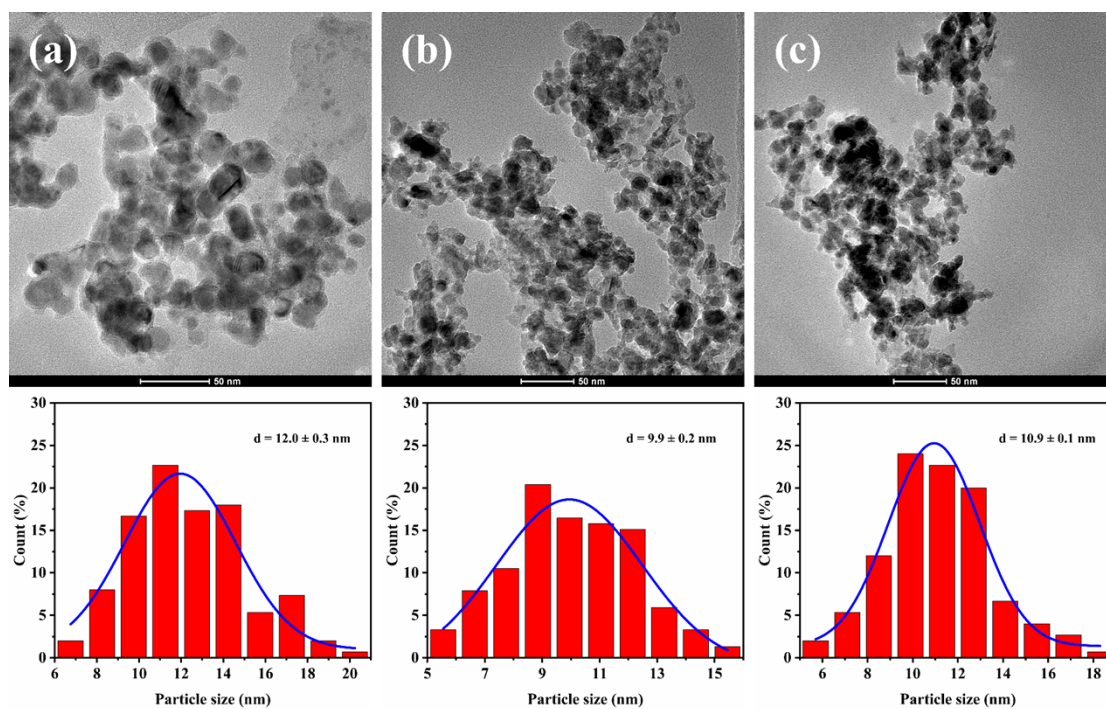

**Fig. S3.** TEM images and histograms of particle size statistical distribution of various catalysts: (a) CZA-1-R; (b) CZA-2-R; (c) CZA-3-R. (The particle size count is 150 for each image).

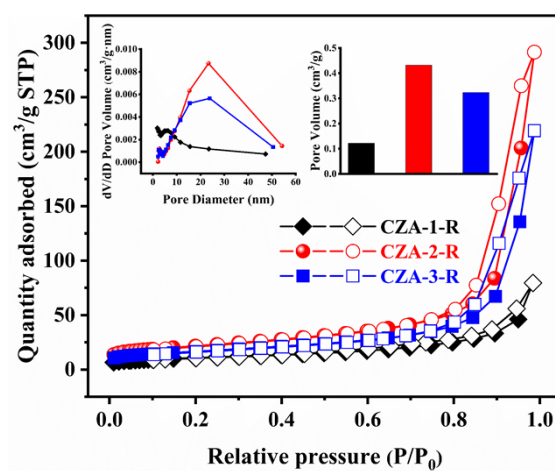

**Fig. S4.**  $N_2$  adsorption-desorption isotherms of the CZA-1-R, CZA-2-R and CZA-3-R.

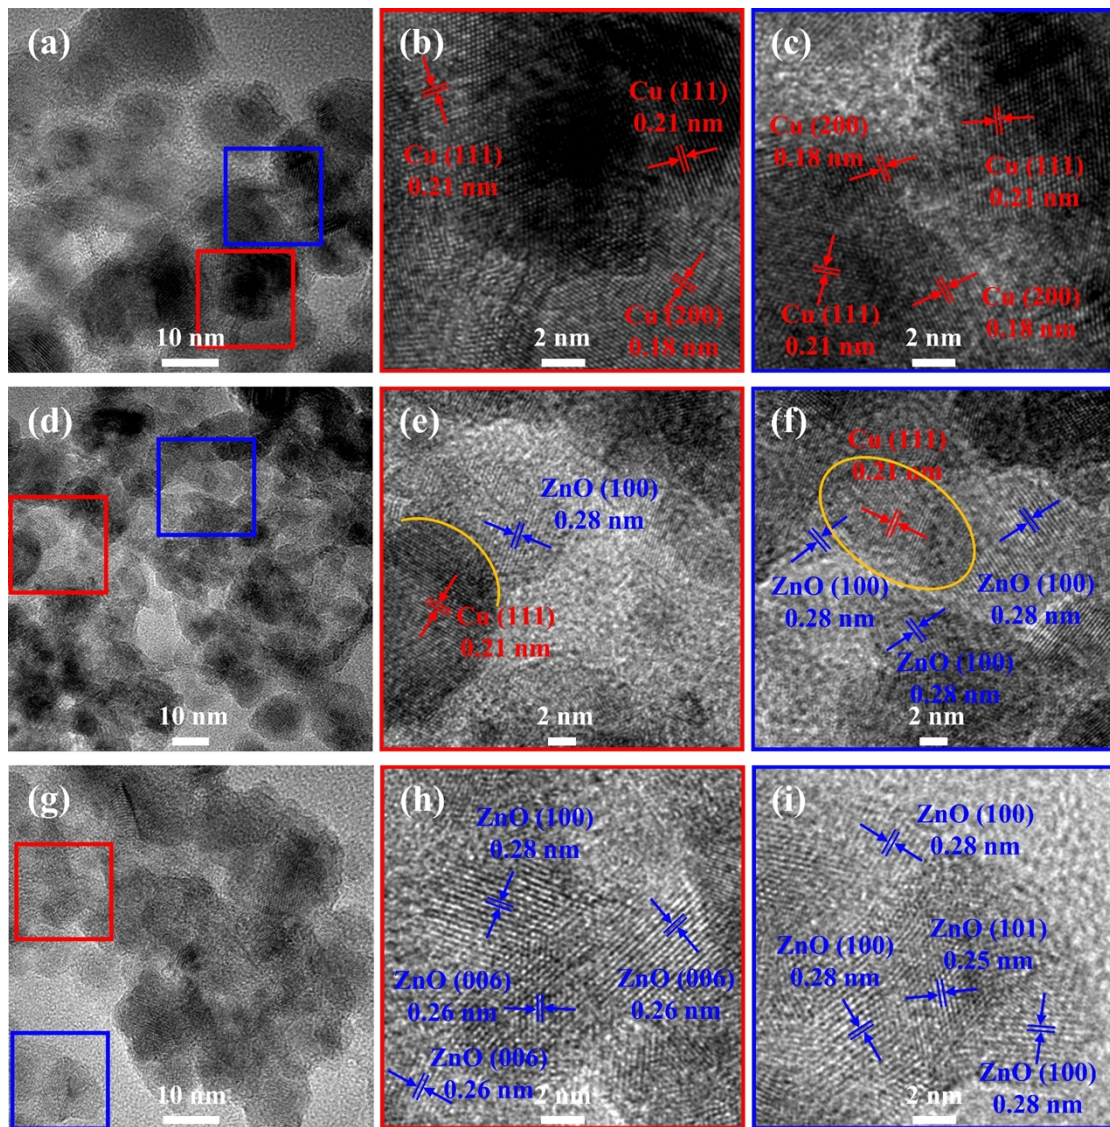

**Fig. S5.** HRTEM images of CZA-1-R (a-c), CZA-2-R (d-f), CZA-3-R (g-i). (Yellow lines represent Cu-ZnO interface)

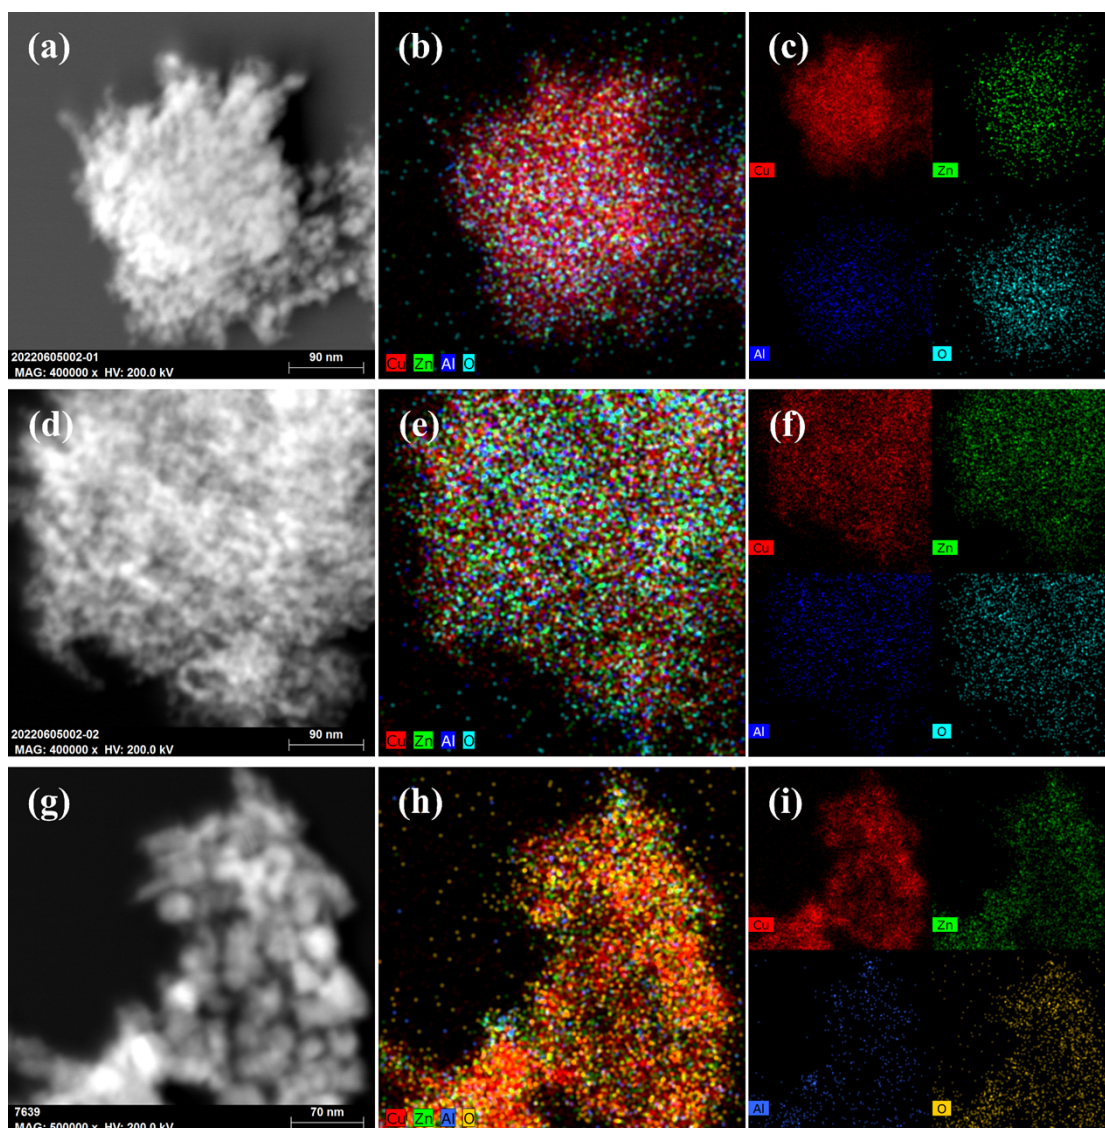

**Fig. S6.** HAADF-STEM images and EDS elemental mappings of Cu, Zn, Al and O for CZA-1-R (a-c), CZA-2-R (d-f) and CZA-3-R (g-i).

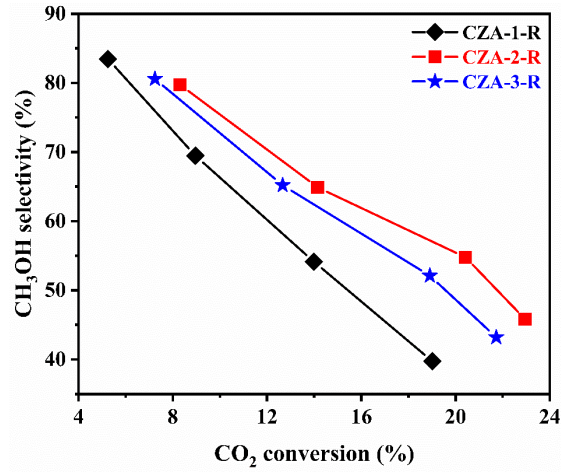

**Fig. S7** Relationship between CO<sub>2</sub> conversion and methanol selectivity in CZA-1-R, CZA-2-R and CZA-3-R.

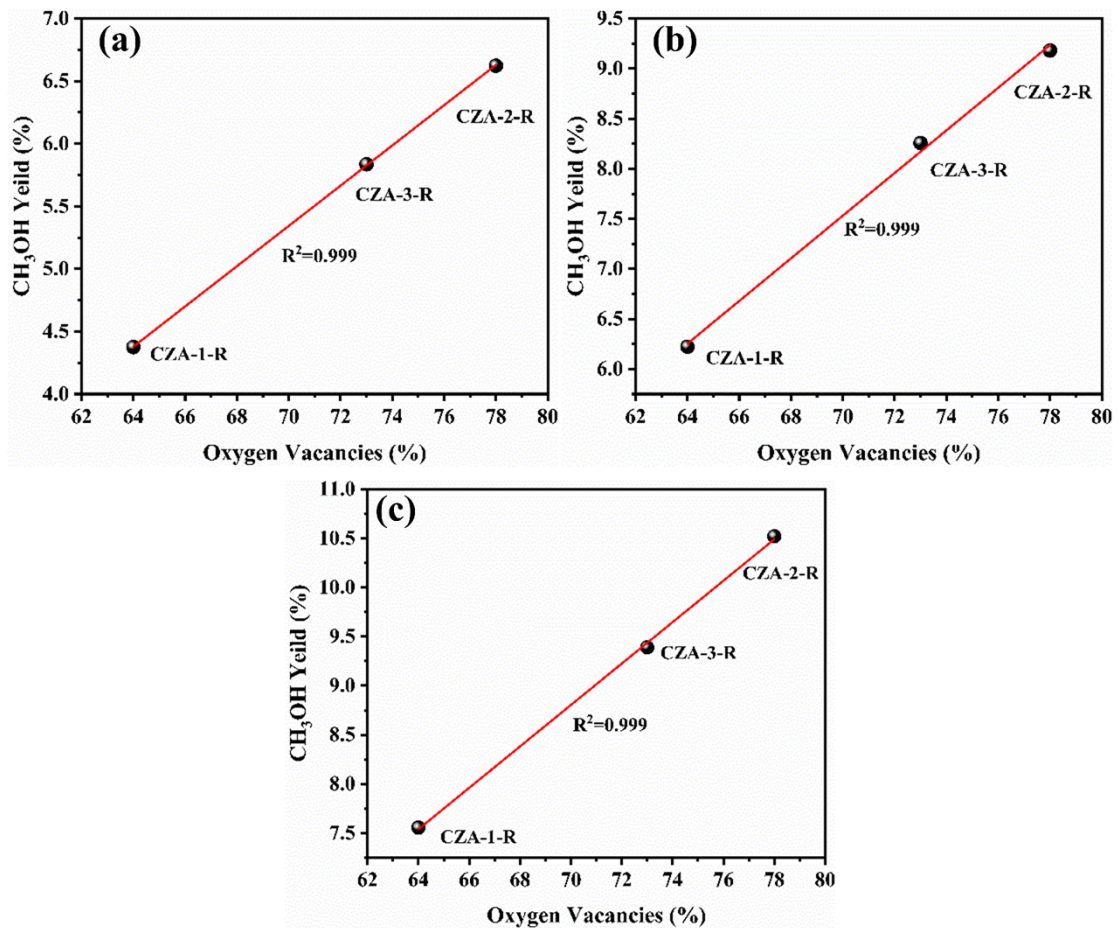

**Fig. S8.** The relationship between the concentration of oxygen vacancies relative to the methanol yield at (a) 190°C, (b) 210°C, (c) 250°C over different catalysts. Reaction conditions: 3 MPa,  $V_{H_2/CO_2} = 3$  and  $WHSV = 10000 \text{ mL} \cdot \text{g}_{\text{cat}}^{-1} \cdot \text{h}^{-1}$ .

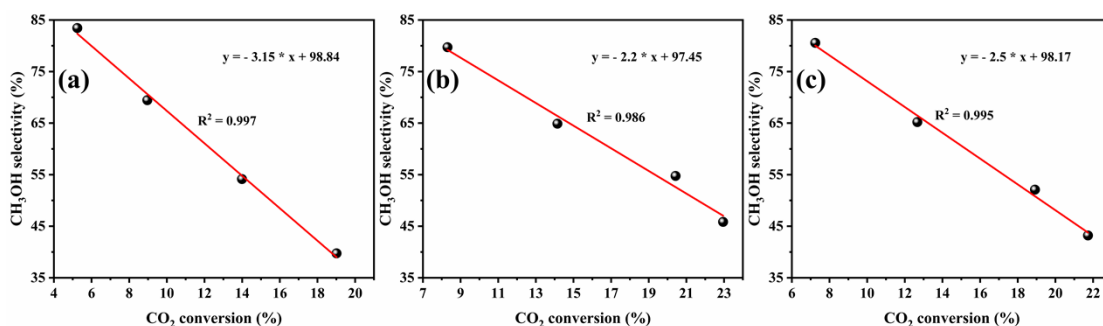

**Fig. S9.** The relationship between CO<sub>2</sub> conversion and methanol selectivity in (a) CZA-1-R, (b) CZA-2-R and (c) CZA-3-R. Reaction conditions: 3 MPa,  $V_{H_2/CO_2} = 3$  and  $WHSV = 10000 \text{ mL} \cdot \text{g}_{\text{cat}}^{-1} \cdot \text{h}^{-1}$ .

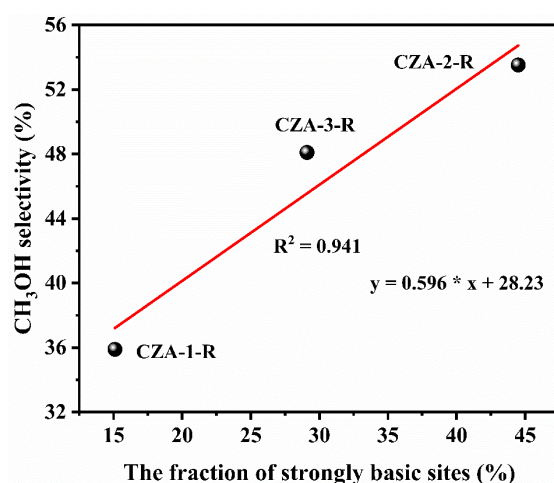

**Fig. S10.** The relationship between the fraction of strongly basic sites relative to all the basic sites and methanol selectivity over the different catalysts at the 20% CO<sub>2</sub> conversion. Reaction conditions: 3 MPa,  $V_{H_2/CO_2} = 3$  and  $WHSV = 10000 \text{ mL} \cdot \text{g}_{\text{cat}}^{-1} \cdot \text{h}^{-1}$ .

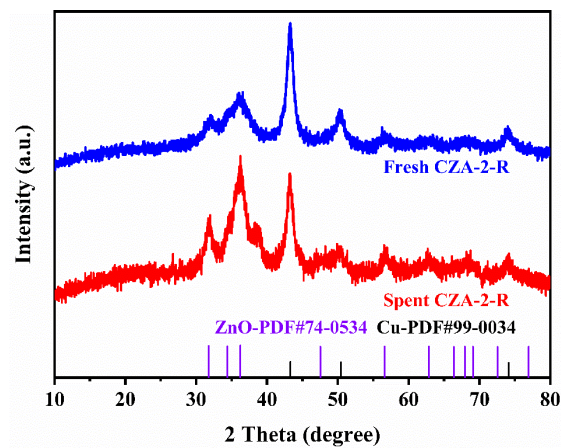

**Fig. S11.** XRD patterns of fresh CZA-2-R and CZA-2-R after 120 h stability test.

**Table S1**Catalytic performance of Cu/ZnO/Al<sub>2</sub>O<sub>3</sub> catalysts in CO<sub>2</sub> hydrogenation to CH<sub>3</sub>OH.

| Catalyst                                               | Preparation method               | H <sub>2</sub> /CO <sub>2</sub> | P (MPa) | T (°C) | SV                                                       | X <sub>CO<sub>2</sub></sub> (%) | S <sub>CH<sub>3</sub>OH</sub> (%) | Yield (%) | Ref       |
|--------------------------------------------------------|----------------------------------|---------------------------------|---------|--------|----------------------------------------------------------|---------------------------------|-----------------------------------|-----------|-----------|
| Cu/ZnO/Al <sub>2</sub> O <sub>3</sub>                  | Co-precipitation                 | 3                               | 3       | 190    | 10000 mL·g <sub>cat</sub> <sup>-1</sup> ·h <sup>-1</sup> | 8.31                            | 79.7                              | 6.6       | This work |
|                                                        |                                  |                                 |         | 210    |                                                          | 14.15                           | 64.9                              | 9.2       |           |
|                                                        |                                  |                                 |         | 230    |                                                          | 20.4                            | 54.8                              | 11.2      |           |
|                                                        |                                  |                                 |         | 250    |                                                          | 23.0                            | 45.8                              | 10.5      |           |
| Cu/Zn/Al-HT                                            | -                                | 3                               | 3       | 250    | 2600 mL·g <sub>cat</sub> <sup>-1</sup> ·h <sup>-1</sup>  | 6                               | 73.4                              | 4.4       | 2         |
| Cu/Zn/Al/Zr                                            | Co-precipitation                 | 3                               | 4       | 240    | 9742 h <sup>-1</sup>                                     | 18.7                            | 47.2                              | 8.8       | 3         |
| Cu/Zn/Zr                                               | Co-precipitation                 | 3                               | 3       | 200    | 8800 h <sup>-1</sup>                                     | 5.8                             | 55.2                              | 3.2       | 4         |
| Cu/Zn/Al                                               | Co-precipitation                 | 3                               | 3       | 230    | -                                                        | 18.7                            | 43                                | 8.0       | 5         |
| Cu/Zn/Al- commercial catalyst                          | -                                | 3                               | 4       | 250    | 18000 h <sup>-1</sup>                                    | 11.1                            | 54.8                              | 6.1       | 6         |
| Cu/Zn/Al-LDO                                           | Hydrothermal                     | 3                               | 3       | 250    | -                                                        | 7                               | 50                                | 3.5       | 7         |
| Cu-ZnO <sup>MOF</sup> ⊂ Al <sub>2</sub> O <sub>3</sub> | Solvothermal                     | 3                               | 3       | 240    | 14400 h <sup>-1</sup>                                    | 9.1                             | 86.9                              | 7.9       | 8         |
| Cu-ZnO/Al <sub>2</sub> O <sub>3</sub>                  | Co-precipitation                 | 3                               | 3       | 240    | 14400 h <sup>-1</sup>                                    | 5.1                             | 79.6                              | 4.1       | 8         |
| Cu-ZnO@Al <sub>2</sub> O <sub>3</sub>                  | Co-precipitation                 | 3                               | 3       | 250    | 1500 mL·g <sub>cat</sub> <sup>-1</sup> ·h <sup>-1</sup>  | 19.8                            | 48                                | 9.5       | 9         |
| 10NG-Cu/Zn/Al                                          | Co-precipitation                 | 3                               | 3       | 200    | -                                                        | 8.2                             | 84                                | 6.8       | 10        |
| Cu/Zn/Al                                               | Ultrasonic co-precipitation      | 3                               | 2       | 200    | 2000 h <sup>-1</sup>                                     | 5                               | 66                                | 3.3       | 11        |
| Cu/Zn/γ-Al <sub>2</sub> O <sub>3</sub>                 | Ammonia deposition-precipitation | 3                               | 4       | 220    | 1500 mL·g <sub>cat</sub> <sup>-1</sup> ·h <sup>-1</sup>  | 15                              | 58.9                              | 8.8       | 12        |
| Cu/ZnO/Al <sub>2</sub> O <sub>3</sub>                  | Co-precipitation                 | 3                               | 5       | 230    | 2500 mL·g <sub>cat</sub> <sup>-1</sup> ·h <sup>-1</sup>  | 27.5                            | 75                                | 20.66     | This work |
| Cu/Zn/Al                                               | Co-precipitation                 | 2.8                             | 5       | 170    | 400 mL·g <sub>cat</sub> <sup>-1</sup> ·h <sup>-1</sup>   | 14.3                            | 54.8                              | 7.8       | 13        |
| Cu/ZnO/Al <sub>2</sub> O <sub>3</sub>                  | Precipitation                    | 2.2                             | 4.5     | 280    | 8000 mL·g <sub>cat</sub> <sup>-1</sup> ·h <sup>-1</sup>  | 12                              | 71.6                              | 8.6       | 14        |
| Cu/Zn/Zr                                               | Co-precipitation                 | 3.89                            | 5       | 280    | 10000 h <sup>-1</sup>                                    | 21                              | 34                                | 7.1       | 15        |
| Cu/Zn/Al/Zr                                            | Co-precipitation                 | 3                               | 5       | 190    | 4000 h <sup>-1</sup>                                     | 18.9                            | 81.1                              | 15.3      | 16        |
| Cu/Zn/Al/Zr                                            | Co-precipitation                 | 3                               | 5       | 250    | 4000 h <sup>-1</sup>                                     | 25.6                            | 61.3                              | 15.7      | 17        |

**Table S2**

The stability of over the reported catalysts for CO<sub>2</sub> hydrogenation to methanol.

| Catalysts                                                       | Before stability test     |                             | After stability test      |                             | Time on stream | Ref.      |
|-----------------------------------------------------------------|---------------------------|-----------------------------|---------------------------|-----------------------------|----------------|-----------|
|                                                                 | CO <sub>2</sub> Conv. (%) | CH <sub>3</sub> OH Sel. (%) | CO <sub>2</sub> Conv. (%) | CH <sub>3</sub> OH Sel. (%) |                |           |
| CZA-2-R                                                         | 20                        | 54.5                        | 20                        | 54.3                        | 120            | This work |
| CZZ                                                             | ~17.0                     | ~45.5                       | ~15                       | ~45.5                       | 100            | 18        |
| CZ/Z                                                            | 15.8                      | 40.4                        | -                         | -                           | 100            | 19        |
| Cu/SiO <sub>2</sub>                                             | 20                        | 23                          | -                         | -                           | 45             | 20        |
| CZS-0                                                           | 14                        | 30                          | 11.7                      | 30.2                        | 41.6           | 21        |
| CZZ-400                                                         | 16.8                      | 41                          | 16.1                      | 42                          | 130            | 22        |
| C <sub>5</sub> Z <sub>2</sub> Z <sub>2.8</sub> W <sub>0.2</sub> | 19.7                      | 49.3                        | ~19.3                     | ~48                         | 100            | 23        |
| CZZ-120                                                         | ~18.4                     | ~37.5                       | ~17.3                     | ~36                         | 100            | 24        |
| CZZ-flower                                                      | ~19                       | ~57                         | ~18                       | ~59                         | 100            | 25        |



## Reference

1. G. Wang, F. Luo, L. Lin and F. Zhao, *React. Kinet., Mech. Catal.*, 2021, **132**, 155-170.
2. X. Fang, Y. Men, F. Wu, Q. Zhao, R. Singh, P. Xiao, T. Du and P. A. Webley, *Chem. Eng. J.*, 2019, **378**, 122052.
3. X. An, J. Li, Y. Zuo, Q. Zhang, D. Wang and J. Wang, *Catal. Lett.*, 2007, **118**, 264-269.
4. F. Arena, K. Barbera, G. Italiano, G. Bonura, L. Spadaro and F. Frusteri, *J. Catal.*, 2007, **249**, 185-194.
5. C. Li, X. Yuan and K. Fujimoto, *Appl. Catal. A Gen.*, 2014, **469**, 306-311.
6. B. An, J. Zhang, K. Cheng, P. Ji, C. Wang and W. Lin, *J. Am. Chem. Soc.*, 2017, **139**, 3834-3840.
7. F. Zhao, L. Fan, K. Xu, D. Hua, G. Zhan and S. Zhou, *J. CO<sub>2</sub> Util.*, 2019, **33**, 222-232.
8. T. Qi, Y. Zhao, S. Chen, W. Li, X. Guo, Y. Zhang and C. Song, *Mol. Catal.*, 2021, **514**.
9. T. T. N. Hoang, Y.-S. Lin, T. N. H. Le, T. K. Le, T. K. X. Huynh and D. Tsai, *Adv. Powder Technol.*, 2021, **32**, 1785-1792.
10. Q. Ma, M. Geng, J. Zhang, X. Zhang and T. Zhao, *ChemistrySelect*, 2019, **4**, 78-83.
11. V. D. B. C. Dasireddy and B. Likozar, *Renew. Energy*, 2019, **140**, 452-460.
12. C. Zhang, H. Yang, P. Gao, H. Zhu, L. Zhong, H. Wang, W. Wei and Y. Sun, *J. CO<sub>2</sub> Util.*, 2017, **17**, 263-272.
13. Y. Liu, Y. Zhang, T. Wang and N. Tsubaki, *Chem. Lett.*, 2007, **36**, 1182-1183.
14. F. Liao, Y. Huang, J. Ge, W. Zheng, K. Tedsree, P. Collier, X. Hong and S. C. Tsang, *Angew Chem Int Ed Engl*, 2011, **50**, 2162-2165.
15. L. Angelo, M. Girleanu, O. Ersen, C. Serra, K. Parkhomenko and A.-C. Roger, *Catal. Today*, 2016, **270**, 59-67.
16. S. Xiao, Y. Zhang, P. Gao, L. Zhong, X. Li, Z. Zhang, H. Wang, W. Wei and Y. Sun, *Catal. Today*, 2017, **281**, 327-336.
17. P. Gao, R. Xie, H. Wang, L. Zhong, L. Xia, Z. Zhang, W. Wei and Y. Sun, *J. CO<sub>2</sub> Util.*, 2015, **11**, 41-48.
18. Y. Liang, D. Mao, X. Guo, J. Yu, G. Wu and Z. Ma, *J. Taiwan Inst. Chem. Eng.*, 2021, **121**, 81-91.
19. J. Yu, G. Chen, Q. Guo, X. Guo, P. Da Costa and D. Mao, *Fuel*, 2022, **324**.
20. Z. Yan, Y. Wang, X. Wang, C. Xu, W. Zhang, H. Ban and C. Li, *Catal. Lett.*, 2022, DOI: 10.1007/s10562-022-04047-7.
21. Y. Wang, X. Wang, Z. Yan, C. Xu, W. Zhang, H. Ban and C. Li, *J. Catal.*, 2022, **412**, 10-20.
22. D. Chen, D. Mao, G. Wang, X. Guo and J. Yu, *J. Sol-Gel Sci. Technol.*, 2019, **89**, 686-699.
23. G. Wang, D. Mao, X. Guo and J. Yu, *Appl. Surf. Sci.*, 2018, **456**, 403-409.
24. C. Huang, D. Mao, X. Guo and J. Yu, *Energy Technol.*, 2017, **5**, 2100-2107.
25. H. Chen, H. Cui, Y. Lv, P. Liu, F. Hao, W. Xiong and H. a. Luo, *Fuel*, 2022, **314**, 123035.
